# Supplementary material for: ELISA-Based Analysis Reveals an Anti-SARS-CoV-2 Protein Immune Response Profile Associated with Disease Severity
Source: MDPI journal article supplement (doi:10.3390/jcm11020405), 2022-01-14
Supplement: s1 [file s1]

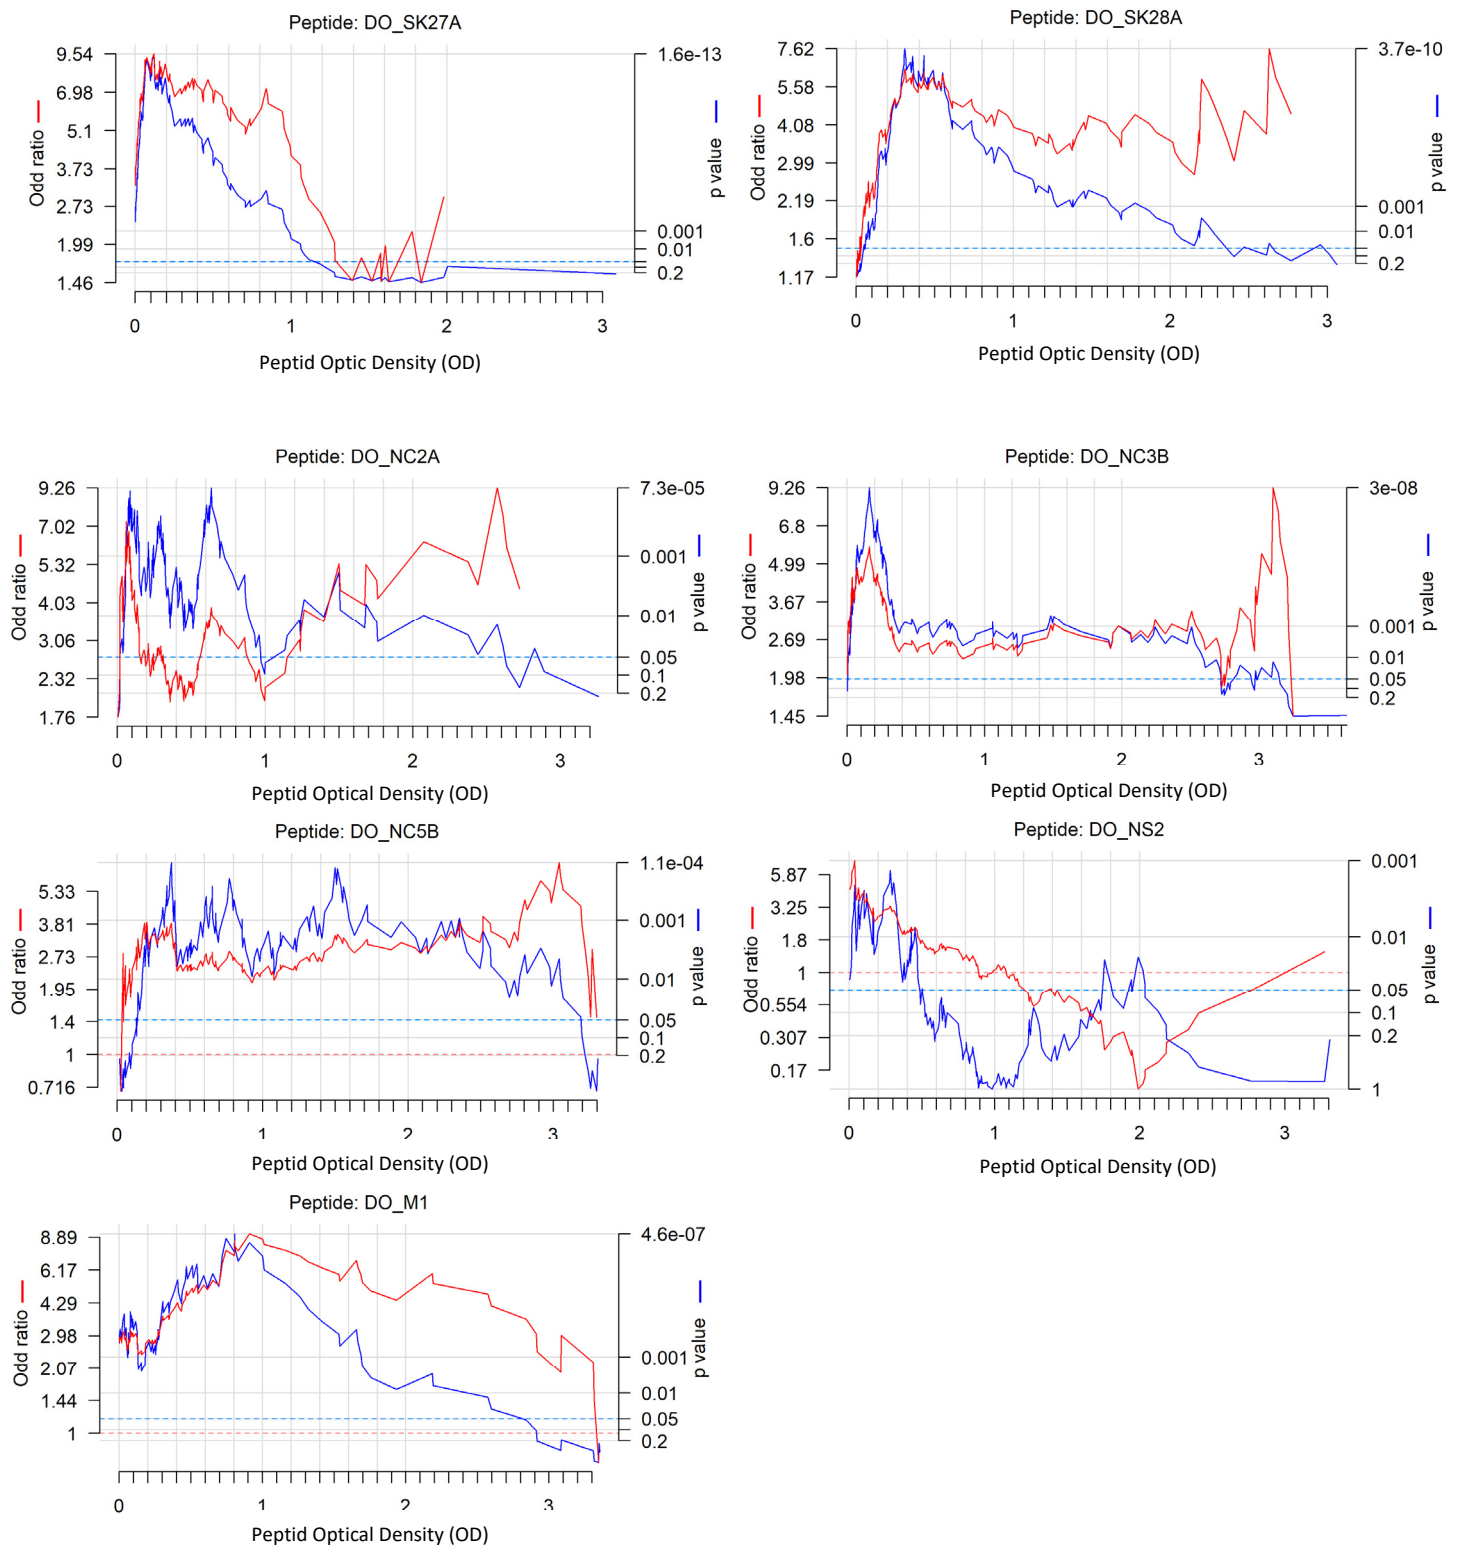

**Figure S1.** Graphic determination of optimal cut-off of OD for each peptide. Each cut-off has been chosen accordingly to the best balance between odds ratio of severity and its p-value. We proposed a graphical plot that illustrates the DO ability to classify the COVID-19 disease as severe according to the variations in the DO value distribution, giving a discrimination threshold = cut-off (on the same basis as ROC curves).

**Table S1.** Peptide sequences of putative immunodominant SARS-CoV-2 IgG linear B-cell epitopes.

| Peptide ID | Position  | Amino acid sequence                     |
|------------|-----------|-----------------------------------------|
| SK1        | 27-46     | AYTNSFTRGVYYPDKVFRSS                    |
| SK2        | 59-78     | FSNVTWFHAIHVSGTNGTKRF                   |
| SK3        | 75-94     | GTKRFDNPVLPFNDGVYFAST                   |
| SK4        | 91-110    | YFASTEKSNIRGWIFGTTLD                    |
| SK5        | 107-126   | GTTLDSKTQSLIVNNATNVV                    |
| SK6        | 123-142   | ATNVVIKVCEFQFCNDPFLGV                   |
| SK7        | 139-158   | PFLGVYYHKNNKSWMESEFRV                   |
| SK8        | 155-174   | SEFRVYSSANNCTFEYVSQPF                   |
| SK8'       | 150-180   | KSWMESEFRVYSSANNCTFEYVSQPFMDLE          |
| SK9        | 171-190   | VSQPFMDLEGGKQGNFKNLRE                   |
| SK10       | 187-206   | KNLREFVFKNIDGYFKIYSKH                   |
| SK11       | 203-222   | IYSKHTPINLVRDLPQGFSAL                   |
| SK12       | 236-255   | TRFQTLALHRSYLTGPDSSS                    |
| SK13       | 252-271   | GDSSSGWTAGAAAYYVGYLQ                    |
| SK13'      | 247-276   | SYLTGPDSSSGWTAGAAAYYVGYLQPRFTL          |
| SK14       | 328-347   | RFPNITNLCPFGEVFNATRFA                   |
| SK15       | 344-363   | ATRFASVYAWNRKRISNCVAD                   |
| SK16       | 360-379   | NCVADYSVLNYSASFSTFKC                    |
| SK16'      | 355-385   | RKRISNCVADYSVLNYSASFSTFKCYGVSP          |
| SK17       | 376-395   | TFKCYGVSPTKLNDLCFTNVY                   |
| SK18       | 392-411   | FTNVYADSFVIRGDEVQRQIAP                  |
| SK19       | 408-427   | RQIAPGQTGKIADYNYKLPDD                   |
| SK18-19    | 391-428   | CFTNVYADSFVIRGDEVQRQIAPGQTGKIADYNYKLPDD |
| SK20       | 424-443   | KLPDDFTGCVIAWNSNNLDSK                   |
| SK22       | 456-475   | FRKSNLKPFERDISTEIQAG                    |
| SK23       | 472-491   | IYQAGSTPCNGVEGFNCYFPL                   |
| SK23'      | 467-497   | DISTEIQAGSTPCNGVEGFNCYFPLQSYGF          |
| SK24       | 488-507   | YFPLQSYGFQPTNGVGYQPYR                   |
| SK25       | 504-523   | GYQPYRVVLSFELLHAPATV                    |
| SK25'      | 499-529   | PTNGVGYQPYRVVLSFELLHAPATVCGPKK          |
| SK26       | 520-539   | APATVCGPKKSTNLVKNKCVN                   |
| SK27       | 549-568   | TGVLTESNKKFLPFQQFGRD                    |
| SK28       | 571-590   | DTTDAVRDPQTLEILDITPCSF                  |
| SK28'      | 566-597   | GRDIADTTDAVRDPQTLEILDITPCSFGGVSV        |
| SK29       | 700-717   | GAENSVAYSNNIAIPTNFT                     |
| SK30       | 782-801   | FAQVKQIYKTPPIKDFGGFNF                   |
| SK31       | 798-817   | GGFNFSQILPDPSKPSKRSF                    |
| SK32       | 877-896   | LLAGTITSGWTFGAGAALQIP                   |
| SK33       | 893-912   | ALQIPFAMQMAYRFNGIGVTQ                   |
| SK34       | 909-928   | IGVTQNVLYENQKLIANQFN                    |
| SK34'      | 904-940   | YRFNGIGVTQNVLYENQKLIANQFNSAIGKIQDSLSS   |
| SK35       | 1067-1086 | YVPAQEKNFTTAPAICHGDKA                   |
| SK35'      | 1062-1092 | FLHVTYVPAQEKNFTTAPAICHGDKAHFPRE         |
| SK36       | 1083-1102 | HDGKAHFPRGVFVSNQTHWF                    |
| SK37       | 1099-1118 | GTHWFVTQRNFPYEPQIITDN                   |
| SK39       | 1131-1150 | GIVNNTVYDPLQPELDSFKE                    |
| NC1        | 22-42     | DSTGSNQNGERSGARSKQRRP                   |
| NC2        | 87-108    | YRRATRRIRGGDGKMKDLSPRW                  |
| NC2'       | 82-112    | DQIGYYRRATRRIRGGDGKMKDLSPRWYFYY         |
| NC3        | 153-172   | NNAAIVLQLPQGTTLPKGFY                    |
| NC3'       | 148-177   | TRNPANNAIVLQLPQGTTLPKGFYAEGSR           |
| NC4        | 177-198   | RGGSQASSRSSRSRNSRNST                    |
| NC5        | 371-390   | DKKKKADETQALPQRQKKQQ                    |
| NC5'       | 366-395   | TEPKKDKKKKADETQALPQRQKKQQTVTLL          |
| NC6        | 1-23      | MSDNGPQNQRNAPRITFGGPSDS                 |
| NC8        | 242-274   | QGQTVTKKSAAEASKPRQKRTATKAYNVQAF         |
| M1         | 1-19      | MADSNGTITVEELKKLLEQ                     |
| NS1        | 24-44     | SCTQHQPYYVDDPCPIHFYSK                   |
| NS2        | 38-59     | PIHFYSKWYIRVGARKSAPLIE                  |
| NS3        | 61-82     | CVDEAGSKSPIQYIDIGNYTVS                  |
| SKS-36     | -         | CESFATGVHFFHGDWRNPVGK                   |

**Table S2.** Peptides of interest: selection. Peptides giving a mean optical density (OD) superior to 0.3 and at least 5 fold superior to the OD obtained with the negative control were selected for further analysis.

| Peptide ID | OD (Mean $\pm$ SD)                             |                   |
|------------|------------------------------------------------|-------------------|
|            | COVID – pool                                   | COVID +           |
| SK1        | 0.047 $\pm$ 0.067                              | 0.056 $\pm$ 0.114 |
| SK2        | 0.072 $\pm$ 0.050                              | 0.073 $\pm$ 0.115 |
| SK3        | 0.033 $\pm$ 0.057                              | 0.055 $\pm$ 0.090 |
| SK4        | 0.099 $\pm$ 0.101                              | 0.086 $\pm$ 0.112 |
| SK5        | 0.007 $\pm$ 0.010                              | 0.059 $\pm$ 0.099 |
| SK6        | 0.020 $\pm$ 0.030                              | 0.073 $\pm$ 0.109 |
| SK7        | 0.072 $\pm$ 0.119                              | 0.075 $\pm$ 0.084 |
| SK8        | 0.008 $\pm$ 0.020                              | 0.102 $\pm$ 0.181 |
| SK8'       | 0.005 $\pm$ 0.010                              | 0.050 $\pm$ 0.085 |
| SK9        | 0.056 $\pm$ 0.046                              | 0.101 $\pm$ 0.151 |
| SK10       | 0.087 $\pm$ 0.128                              | 0.126 $\pm$ 0.140 |
| SK11       | 0.031 $\pm$ 0.059                              | 0.086 $\pm$ 0.184 |
| SK12       | 0.066 $\pm$ 0.063                              | 0.082 $\pm$ 0.084 |
| SK13       | 0.023 $\pm$ 0.027                              | 0.099 $\pm$ 0.124 |
| SK13'      | 0.002 $\pm$ 0.008                              | 0.018 $\pm$ 0.061 |
| SK14       | 0.122 $\pm$ 0.111                              | 0.112 $\pm$ 0.125 |
| SK15       | 0.170 $\pm$ 0.070                              | 0.320 $\pm$ 0.238 |
| SK16       | 0.012 $\pm$ 0.029                              | 0.101 $\pm$ 0.166 |
| SK16'      | 0.019 $\pm$ 0.051                              | 0.020 $\pm$ 0.047 |
| SK17       | 0.034 $\pm$ 0.05                               | 0.152 $\pm$ 0.186 |
| SK18       | 0.084 $\pm$ 0.094                              | 0.075 $\pm$ 0.097 |
| SK19       | 0.022 $\pm$ 0.021                              | 0.117 $\pm$ 0.170 |
| SK18-19    | 0.016 $\pm$ 0.014                              | 0.042 $\pm$ 0.095 |
| SK20       | 0.062 $\pm$ 0.088                              | 0.078 $\pm$ 0.129 |
| SK22       | 0.047 $\pm$ 0.060                              | 0.129 $\pm$ 0.263 |
| SK23       | 0.009 $\pm$ 0.014                              | 0.128 $\pm$ 0.223 |
| SK23'      | 0.00043 $\pm$ 0.002                            | 0.062 $\pm$ 0.161 |
| SK24       | 0.077 $\pm$ 0.101                              | 0.123 $\pm$ 0.232 |
| SK25       | 0.027 $\pm$ 0.057                              | 0.018 $\pm$ 0.038 |
| SK25'      | 0.032 $\pm$ 0.016                              | 0.074 $\pm$ 0.108 |
| SK26       | 0.205 $\pm$ 0.065                              | 0.464 $\pm$ 0.409 |
| SK27       | 0.024 $\pm$ 0.027                              | 0.335 $\pm$ 0.450 |
| SK28       | 0.175 $\pm$ 0.063                              | 0.748 $\pm$ 0.746 |
| SK28'      | 0.034 $\pm$ 0.076                              | 0.349 $\pm$ 0.425 |
| SK29       | 0.084 $\pm$ 0.103                              | 0.085 $\pm$ 0.110 |
| SK30       | 0.063 $\pm$ 0.051                              | 0.328 $\pm$ 0.556 |
| SK31       | 0.134 $\pm$ 0.223                              | 0.112 $\pm$ 0.158 |
| SK32       | 0.136 $\pm$ 0.178                              | 0.086 $\pm$ 0.134 |
| SK33       | 0.017 $\pm$ 0.042                              | 0.058 $\pm$ 0.144 |
| SK34       | 0.056 $\pm$ 0.095                              | 0.036 $\pm$ 0.084 |
| SK34'      | 0.00018 $\pm$ 0.001                            | 0.055 $\pm$ 0.224 |
| SK35       | 0.164 $\pm$ 0.167                              | 0.123 $\pm$ 0.198 |
| SK35'      | 0.014 $\pm$ 0.032                              | 0.061 $\pm$ 0.111 |
| SK36       | 0.222 $\pm$ 0.293                              | 0.079 $\pm$ 0.118 |
| SK37       | 0.041 $\pm$ 0.045                              | 0.074 $\pm$ 0.107 |
| SK39       | 0.087 $\pm$ 0.121                              | 0.093 $\pm$ 0.159 |
| NC1        | 0.003 $\pm$ 0.006                              | 0.048 $\pm$ 0.125 |
| NC2        | 0.101 $\pm$ 0.132                              | 0.605 $\pm$ 0.664 |
| NC2'       | 0.009 $\pm$ 0.034                              | 0.212 $\pm$ 0.304 |
| NC3        | 0.002 $\pm$ 0.007                              | 0.454 $\pm$ 0.700 |
| NC3'       | 0.017 $\pm$ 0.031                              | 1.063 $\pm$ 1.187 |
| NC4        | 0.021 $\pm$ 0.016                              | 0.122 $\pm$ 0.257 |
| NC5        | 6.10 <sup>-5</sup> $\pm$ 2.46.10 <sup>-4</sup> | 0.253 $\pm$ 0.438 |
| NC5'       | 0.082 $\pm$ 0.038                              | 1.103 $\pm$ 0.856 |
| NC6        | 0.005 $\pm$ 0.019                              | 0.088 $\pm$ 0.284 |
| NC8        | 0.202 $\pm$ 0.058                              | 0.237 $\pm$ 0.286 |
| M1         | 0.032 $\pm$ 0.105                              | 0.489 $\pm$ 0.856 |
| NS1        | 0.057 $\pm$ 0.202                              | 0.068 $\pm$ 0.174 |
| NS2        | 0.176 $\pm$ 0.084                              | 1.275 $\pm$ 0.725 |
| NS3        | 0.037 $\pm$ 0.078                              | 0.208 $\pm$ 0.554 |
